# Supplementary material for: Cryopreservation in 95% serum with 5% DMSO maintains colony formation and chondrogenic abilities in human synovial mesenchymal stem cells
Source: Springer Nature journal article supplement (doi:10.1186/s12891-019-2700-3), 2019-07-06

# Supplementary Figure 2

## Pellet weight

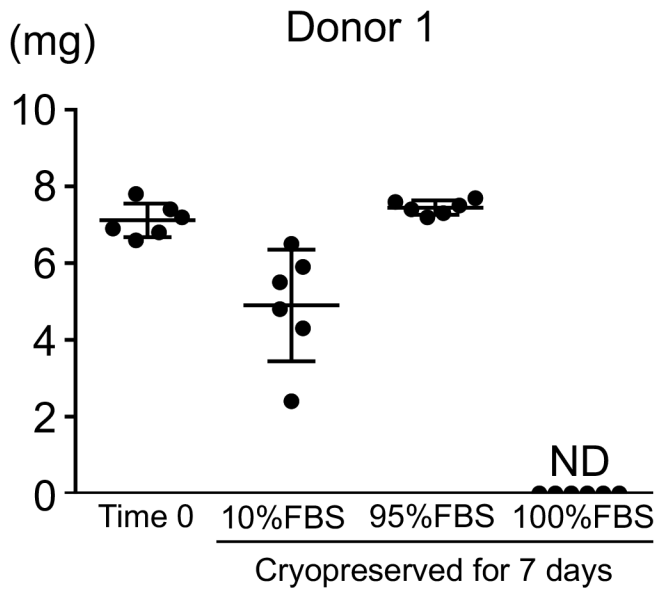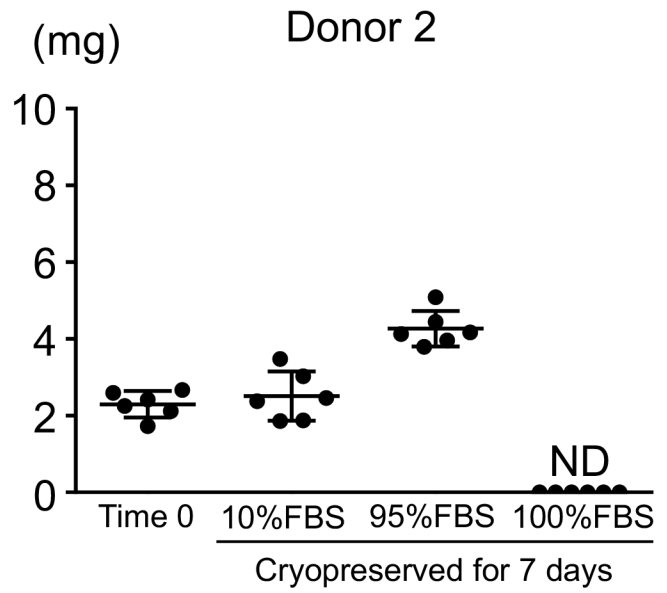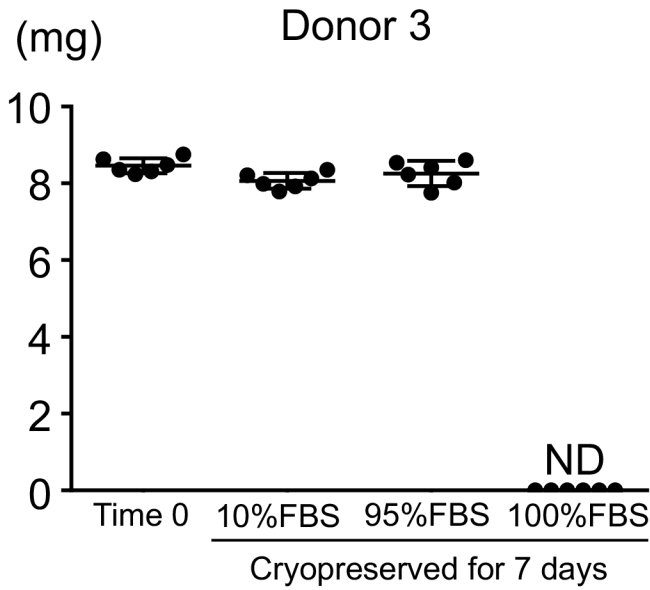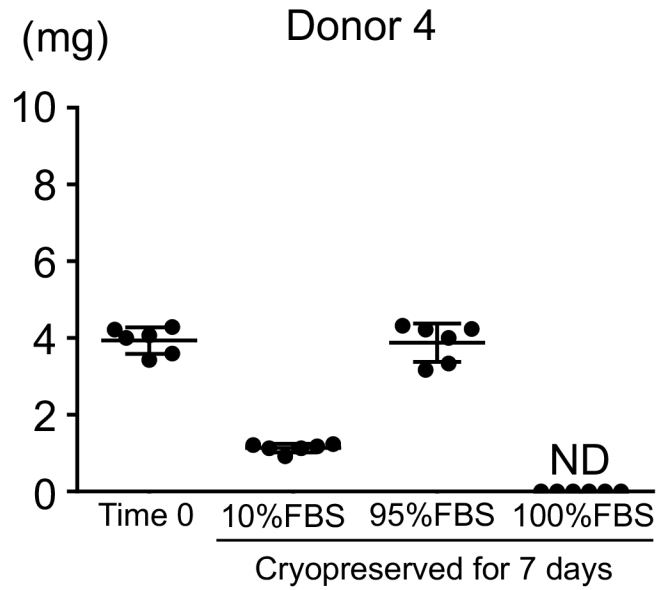

Supplement: MOESM2 [file 16902050]
