# Supplementary figures and images for: Cryopreservation in 95% serum with 5% DMSO maintains colony formation and chondrogenic abilities in human synovial mesenchymal stem cells
Source: Springer Nature journal article supplement (doi:10.1186/s12891-019-2700-3), 2019-07-06

Supplementary Figure 1 (c)

Cell number/colony number

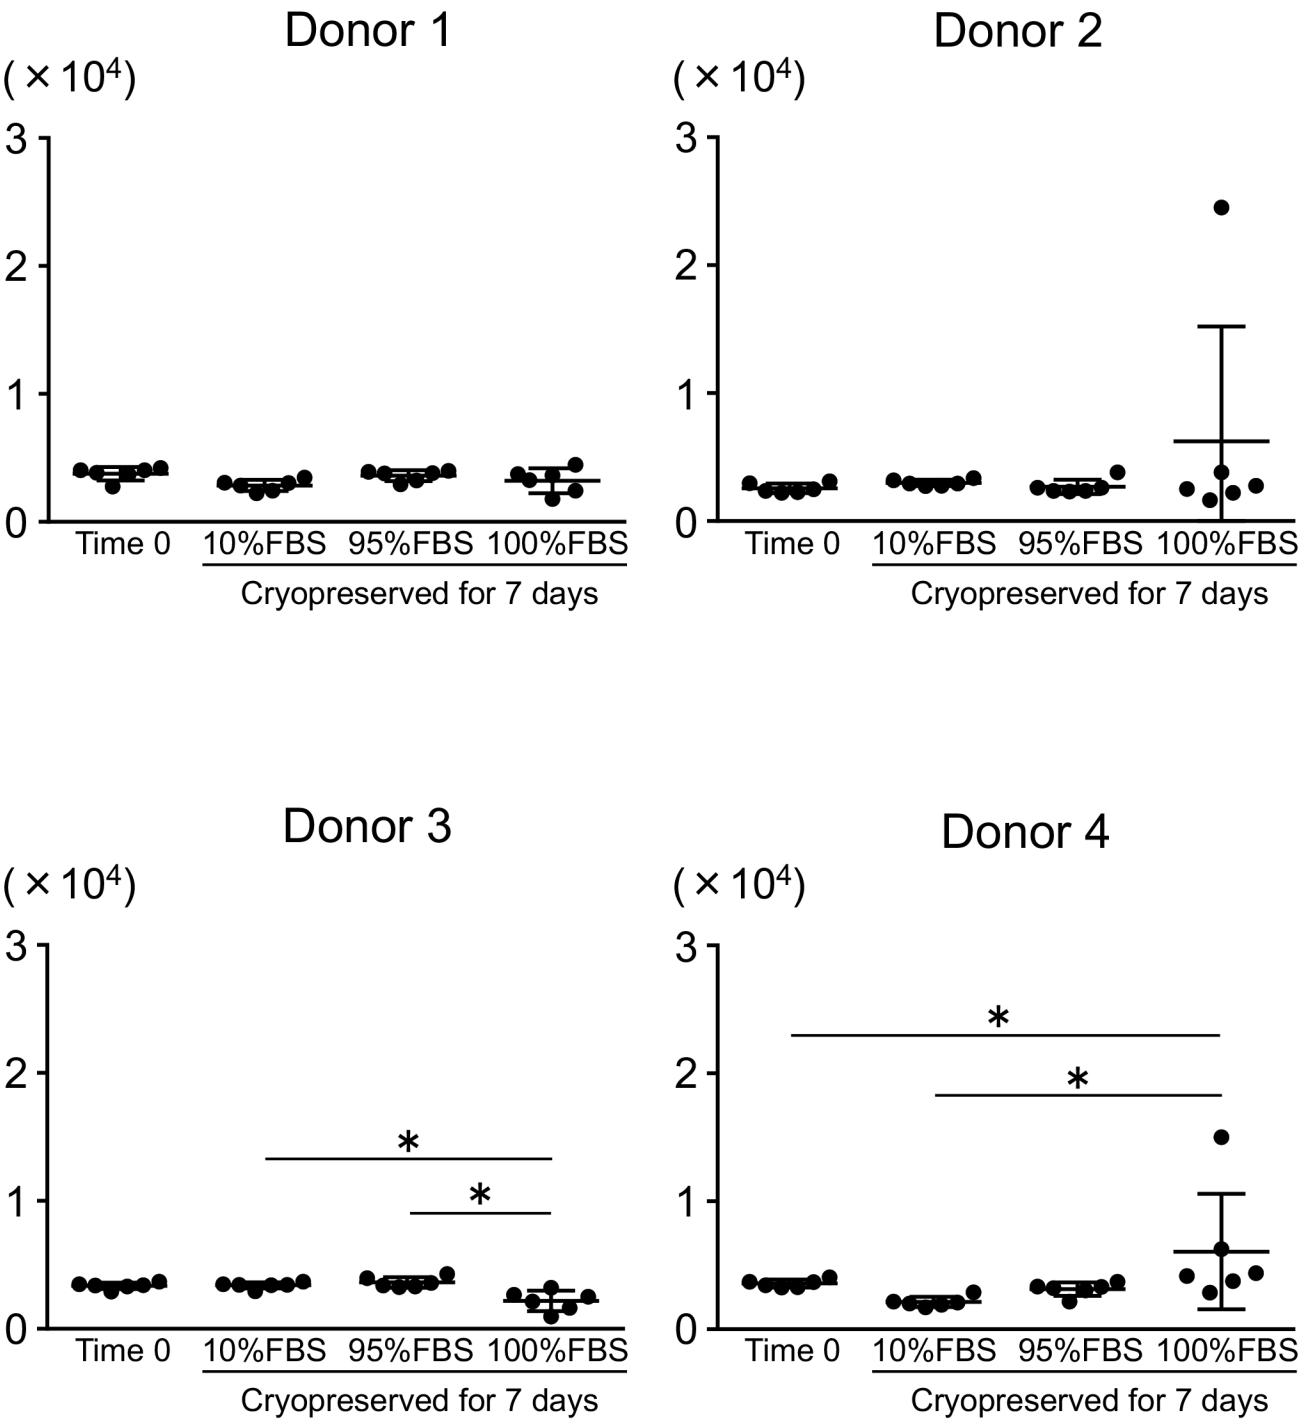

Supplement: MOESM1 [file 16902050]

Supplementary Figure 1 (a)

Colony number/dish

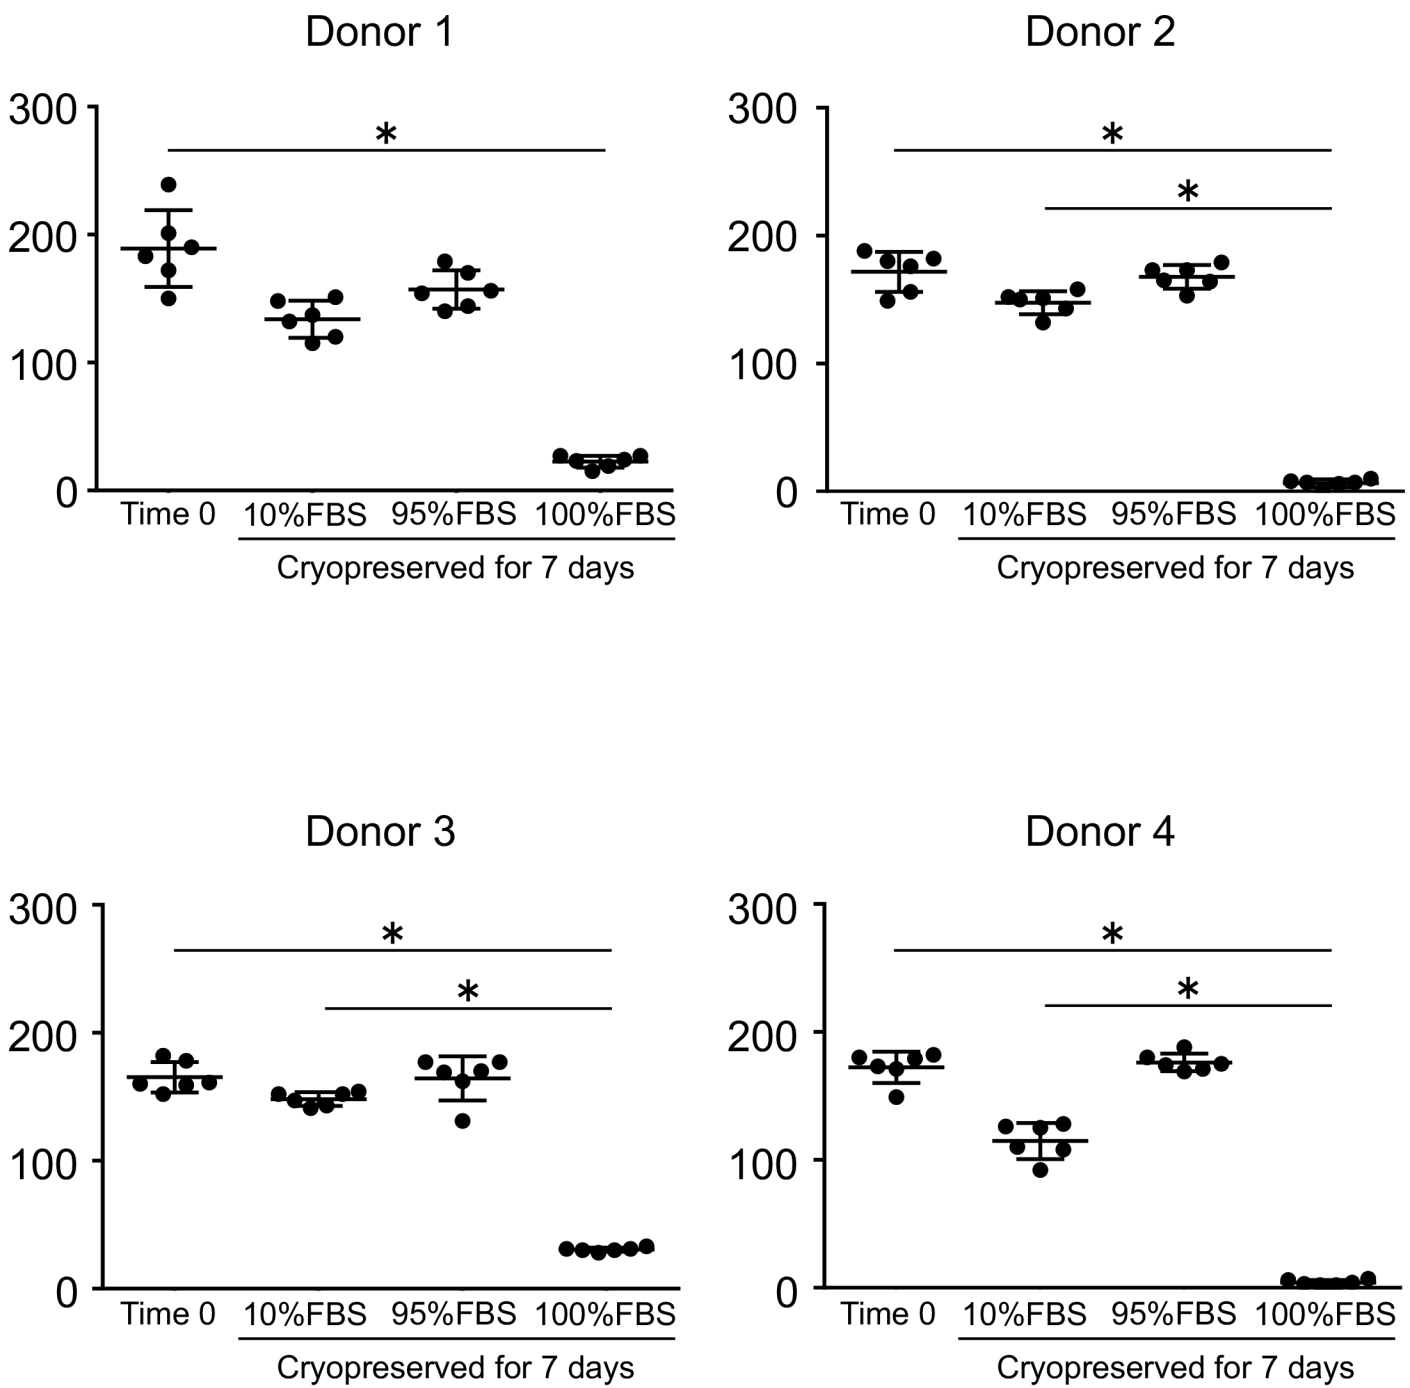

Supplement: MOESM1 [file 16902050]

Supplementary Figure 1 (b)

Cell number/dish

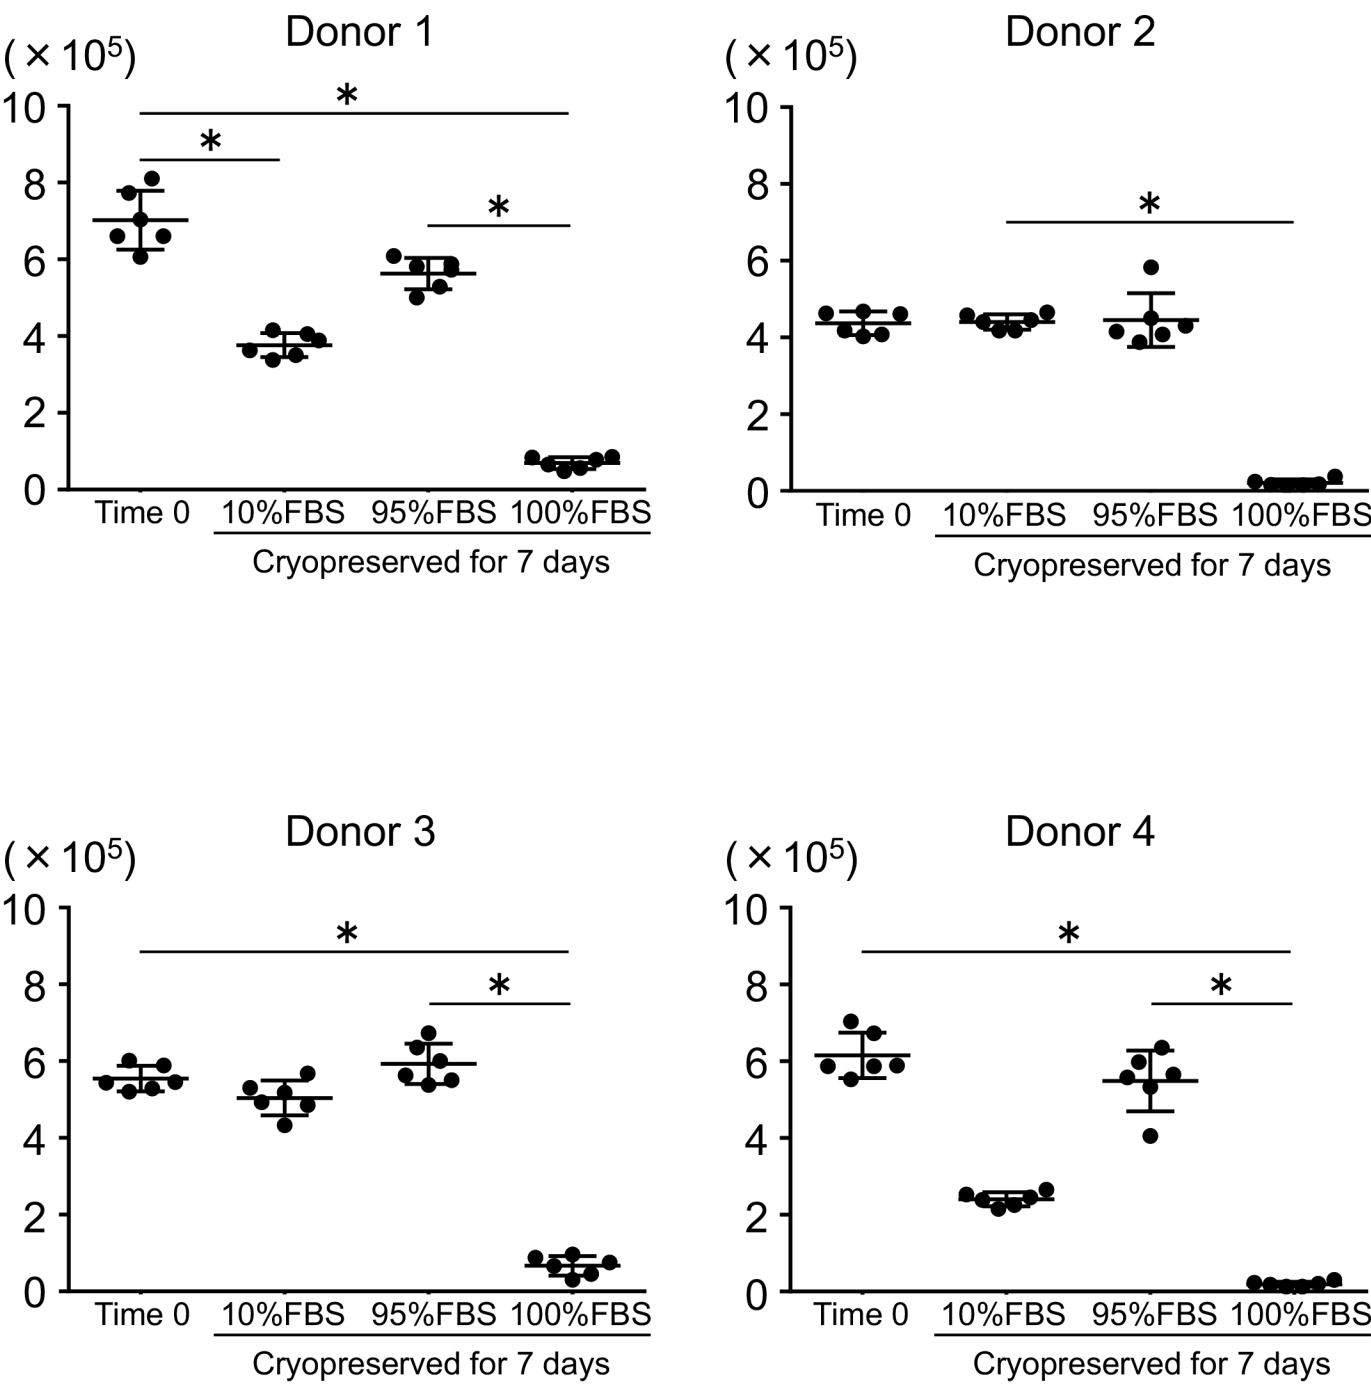

Supplement: MOESM1 [file 16902050]
